# Supplementary material for: Optimized distributed systems achieve significant performance improvement on sorted merging of massive VCF files
Source: Gigascience. 2018 May 10;7(6):giy052. doi: 10.1093/gigascience/giy052 (PMC6007233; doi:10.1093/gigascience/giy052)
Supplement: Supplemental Files [file giy052_supplemental_files.zip]

Archive with 4 entries (4 files):
- FigureS1.pdf
- FigureS2.pdf
- FigureS3.pdf
- minor_revision_1.10_marked.docx
