# Supplementary material for: Optimized distributed systems achieve significant performance improvement on sorted merging of massive VCF files
Source: Gigascience. 2018 May 10;7(6):giy052. doi: 10.1093/gigascience/giy052 (PMC6007233; doi:10.1093/gigascience/giy052)
Supplement: Supplemental Files [file giy052_supplemental_files.zip › FigureS1.pdf]

## MapReduce Schema

### Phase I

#### Mapper

loading VCF files by parallel mappers  
for each record in each mapper:  
    quality check  
    if not pass: continue  
    total\_record++  
    if sampled\_record/total\_record <= sampling\_rate:  
        sampled\_record++  
        parse genotype  
        send <pos, chr\_n> to partitioner  
output <pos, sample\_id+chr\_n+ref+genotype> to chr\_n directory  
on HDFS

#### Partitioner

for each record:  
    sent to reducer of its chr

#### Reducer

for each chr, launch one reducer:  
for each sampled record:  
    count++  
    if count >= number of input files:  
        count = 0  
        output <pos, null> to chr\_n's partition list file in  
distributed cache

### Phase II

for each chr, launch one MapReduce job:

for each job:

#### Mapper

loading data from the corresponding chr directory  
for each record:  
    output to TotalOrderPartitioner

#### Partitioner

load its chr's partition list from distributed cache:  
if partition list is empty:  
    Resample records of its chr with higher rate  
for each record  
    find pos<sub>left</sub>, pos<sub>right</sub> in partition list such that  
    pos<sub>record</sub> ∈ [pos<sub>left</sub>, pos<sub>right</sub>]  
    output record to reducer of this interval

#### Reducer

for each pos interval in partition list, launch one reducer  
group records by pos  
join records to TPED format  
output joined record onto HDFS
