# Supplementary material for: Optimized distributed systems achieve significant performance improvement on sorted merging of massive VCF files
Source: Gigascience. 2018 May 10;7(6):giy052. doi: 10.1093/gigascience/giy052 (PMC6007233; doi:10.1093/gigascience/giy052)
Supplement: Supplemental Files [file giy052_supplemental_files.zip › FigureS2.pdf]

## HBase Schema

if not incremental join start **Sampling Phase**

same as **Phase I of MapReduce Schema**

else **Bulk Loading Phase**

create HBase table with region boundaries = record<sub>i</sub> in partition lists where  $i \% \{\text{number of regions}\} == 0$

### Mapper

load data by parallel mappers

if incremental join:

load input files

filter out unqualified records

else:

load outputs from **Sampling Phase**

for each record in each mapper:

reformat to HBase compatible key, value

send to the reducer of the region where the key belongs to

### Reducer

for each region launch one reducer

for each record:

write into HFile of the region

### Loading table

move HFiles into HBase data directory

backend sorting records by Log-Structured Merge Tree (LSMT)

## Exporting Phase

define a scan over the query range

### Mapper

launch one mapper for each region within the query range

for each mapper:

join contiguous records of same pos into a TPED record

output joined record onto HDFS
